# Supplementary material for: Olfactory impairment remains three years after COVID-19
Source: Research Square preprint supplement (doi:10.21203/rs.3.rs-7337899/v1), 2025-10-06
Supplement: Supplementary file 1 [file 4e04c5c1852c2a1a6b4da5c9.docx]

**Supplementary Table S1.** Olfactory dysfunction of the recovered patients by T&T (n=7).

| **Characteristics** | No. (%) |
| --- | --- |
| T&T>1 | 7 (4.5) |
| Gender |  |
| Male | 2 (28.6) |
| Female | 5 (71.4) |
| Age |  |
| 50-59 | 2 (28.6) |
| 60-69 | 1 (14.3) |
| 70-79 | 4 (57.1) |
| Abnormal odors |  |
| Garlic | 5 (71.4) |
| Pineapple | 7 (100.0) |
| Mint | 5 (71.4) |
| Ginger | 7 (100.0) |
| Rose | 7 (100.0) |

T&T, Toyota‐Takagi olfactometry scores.

**Supplementary Table S2.** Basic information of the typical 9 patients.

| **Patient** | **Age** | **Sex** | **Duration (Days)** | **BMI** | **Underlying diseases** | **Symptoms** | **Interventions** |
| --- | --- | --- | --- | --- | --- | --- | --- |
| 1 | 51 | F | 38 | 22.9 | Rhinitis, diabetes，cardiovascular disease | Cough, fever, pharyngalgia, abdominal pain and diarrhea, dyspinic, fatigue, myalgia, stethalgia | LHQW |
| 2 | 67 | F | 16 | 21.5 | / | / | / |
| 3 | 62 | M | 48 | 23.5 | / | Abdominal pain and diarrhea, dyspinic | LHQW |
| 4 | 59 | F | 29 | 24 | Rhinitis | / | / |
| 5 | 67 | F | 14 | 21.5 | / | / | / |
| 6 | 71 | M | 35 | 25 | Rhinitis | / | / |
| 7 | 35 | F | 11 | 23.9 | / | Cough, rhinorrhea, fever, headache, pharyngalgia, abdominal pain and diarrhea, dyspinic, fatigue, myalgia | LHQW |
| 8 | 52 | F | 24 | 22 | / | Cough, headache, pharyngalgia, fatigue, myalgia | LHQW |
| 9 | 51 | F | 20 | 25.3 | / | Cough, fever, pharyngalgia, fatigue, myalgia | LHQW |

BMI, Body Mass Index; LHQW, Lianhuaqingwen medicine.
